# Supplementary material for: Cardiomyocyte Differentiation from Mouse Embryonic Stem Cells by WNT Switch Method
Source: Preprints.org preprint supplement (doi:10.20944/preprints202312.1407.v1), 2023-12-19
Supplement: Supplementary file 1 [file supplementary]

| Primer Name | Strand | Sequence |  |
| --- | --- | --- | --- |
| Nanog | F | ACC TGA GCT ATA AGC AGG TTA AGA C |  |
| Nanog | R | GTG CTG AGC CCT TCT GAA TCA GAC |  |
| Oct3/4 | F | GTT CTC TTT GGA AAG GTG TTC AGC |  |
| Oct3/5 | R | ATC TCC TGA AGG TTC TCA TTG TTG T |  |
| Brachyury | F | CTGTGACTGCCTACCAGAATGAGGAG |  |
| Brachyury | R | GGTCGTTTCTTTCTTTGGCATCAAG |  |
| Wnt3 | F | CCGCTTCTGTCTAGGGTCTG |  |
| Wnt3 | R | GGTAGAGAGTGCAGGCAAGG |  |
| Gata4 | F | CTCTATCACAAGATGAACGGCATCAAC |  |
| Gata4 | R | TCTGGCAGTTGGCACAGGAGAG |  |
| Lhx1 | F | CCTGGACCGCTTTCTCTTGAA |  |
| Lhx1 | R | ACCGAAACACCGGAAGAAGTC |  |
| cTnT | F | GAGGAGGTGGTGGAGGAGTA |  |
| cTnT | R | GGCTTCTTCATCAGGACCAA |  |
| Myh6 | F | GATGGCACAGAAGATGCTGA |  |
| Myh6 | R | CTGCCCCTTGGTGACATACT |  |
| Nkx2.5 | F | CCACTCTCTGCTACCCACCT |  |
| Nkx2.5 | R | CCAGGTTCAGGATGTCTTTGA |  |
| Gapdh | F | CAAAATGGTGAAGGTCGGTGTGAA |  |
| Gapdh | R | CAACAATCTCCACTTTGCCACTG |  |

Table s1: RT-qPCR primers used in study
